# Supplementary material
Source: HighWire-hosted journal article supplement (https://www.highwirestage.com/highwire/filestream/72899/field_highwire_adjunct_files/0/19-00832.pdf)
Supplement: 19-00832.pdf [file 19-00832.pdf]

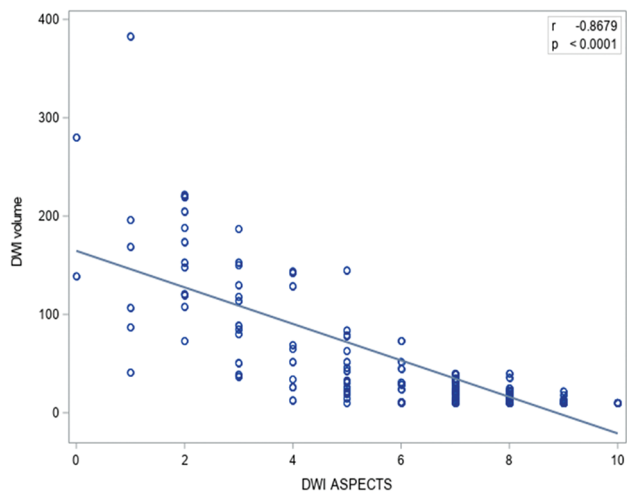

**ON-LINE FIGURE.** Plot showing the relation between DWI-ASPECTS and DWI lesion volume: correlation coefficient,  $r = 0.87$ .
